# Supplementary material for: An MIL-53(FeNiCo) decorated BiVO4 photoanode for efficient photoelectrochemical water oxidation
Source: Royal Society of Chemistry journal article supplement (doi:10.1039/d4dt03089c), 2025-01-01
Supplement: d4dt03089c1.pdf [file d4dt03089c1.pdf]

## **MIL-53(FeNiCo) decorated BiVO<sub>4</sub> photoanode for efficient photoelectrochemical water oxidation**

Leiting Si<sup>a, b\*</sup>, Jiawei Yang<sup>b</sup>, Guang Liu<sup>b\*</sup>

a Shanxi Coshare Innovation Institute of Energy & Environment, Taiyuan, Shanxi 030006, China.

b Shanxi Key Laboratory of Gas Energy Efficient and Clean Utilization, College of Chemistry and Chemical Engineering, Taiyuan University of Technology, Taiyuan, Shanxi 030024, China.

### **Preparation of BiVO<sub>4</sub>/MIL-53(FeNi<sub>x</sub>) (x = 1.6, 2.0, 2.4) photoanodes**

1, 4-BDC (0.1 mmol, 16.6 mg), Ni (NO<sub>3</sub>)<sub>2</sub> 6H<sub>2</sub>O (0.16 mmol, 46.6 mg) and FeCl<sub>3</sub> 6H<sub>2</sub>O (0.1 mmol, 27.0 mg) were sequentially added to a Teflon vessel (30 ml) containing 12 mL of DMA. The mixture was then stirred for a few minutes to form a dark yellow solution. The prepared BiVO<sub>4</sub> electrode was placed in the above solution, and it was transferred to a stainless-steel autoclave and heated in an oven at 150 °C for 3 hours. Finally, the photoelectrode was taken out and washed three times with ethanol and water, respectively, and dried at 60 °C for 12 h. MIL-53(FeNi<sub>2.0</sub>) and MIL-53(FeNi<sub>2.4</sub>) were prepared using similar procedures except different molar concentration of Ni (NO<sub>3</sub>)<sub>2</sub> 6H<sub>2</sub>O (0.20 mmol and 0.24 mmol).

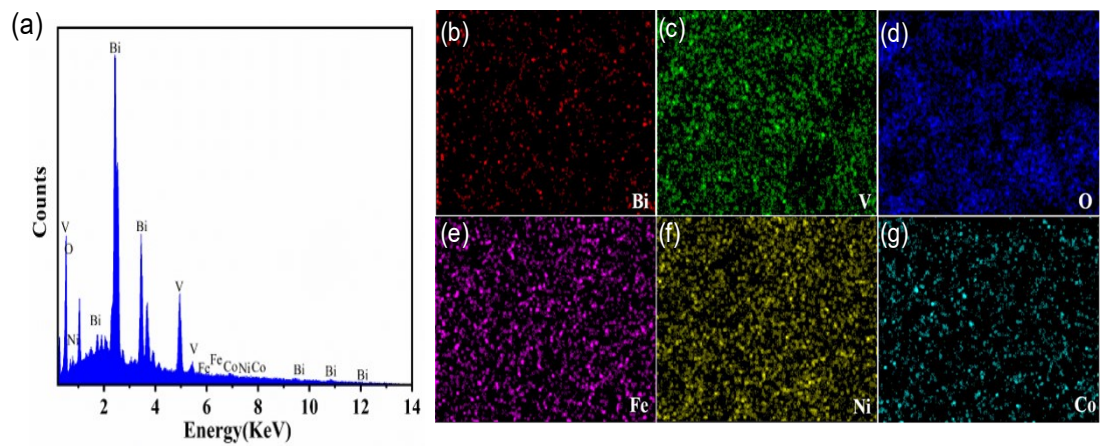

**Fig. S1.** The corresponding element mapping of  $\text{BiVO}_4/\text{MIL-53}(\text{FeNiCo})$ .

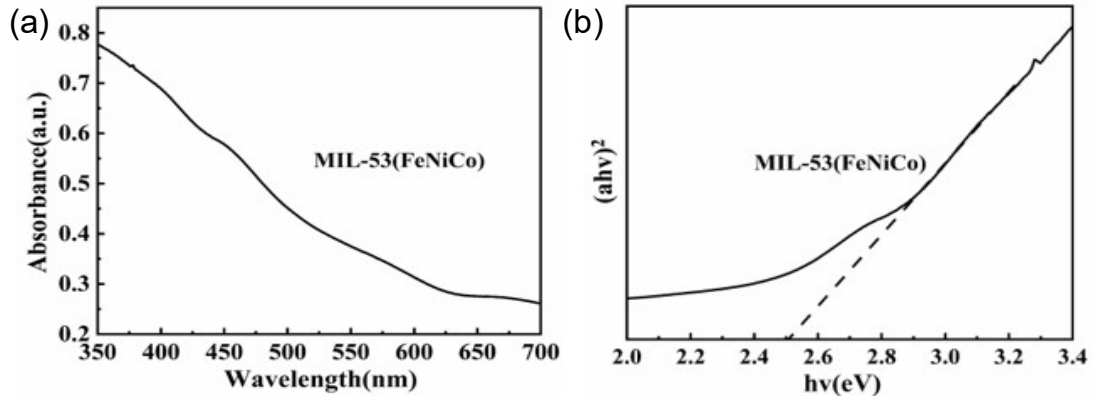

**Fig. S2.** (a) UV-vis absorption spectra and (d) Tauc plots of MIL-53(FeNiCo).

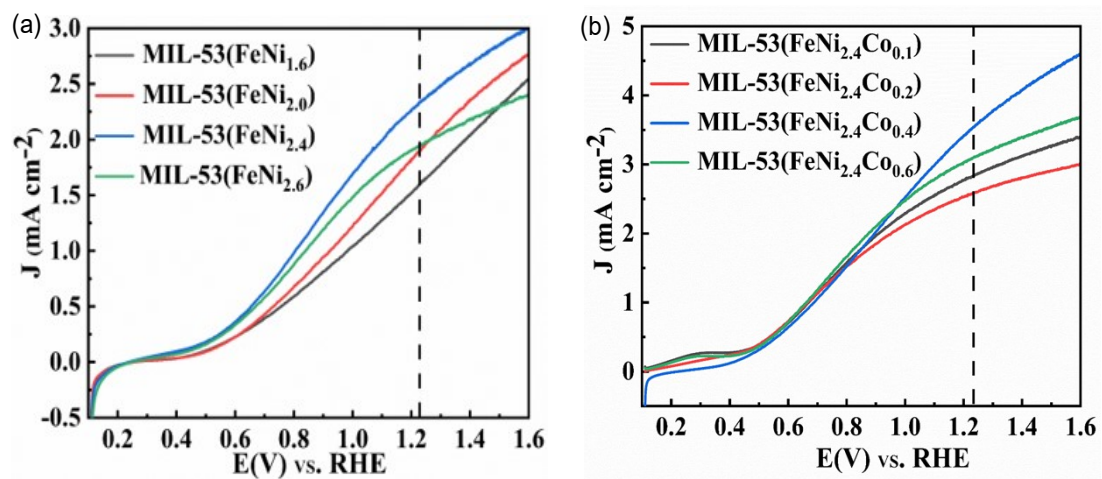

**Fig. S3.** (a) J-V curves of  $\text{BiVO}_4/\text{MIL-53}(\text{FeNi})$  prepared with different molar ratio of Fe, Ni; (b) J-V curves of  $\text{BiVO}_4/\text{MIL-53}(\text{FeNiCo})$  prepared with different molar ratio of Fe, Ni, Co.

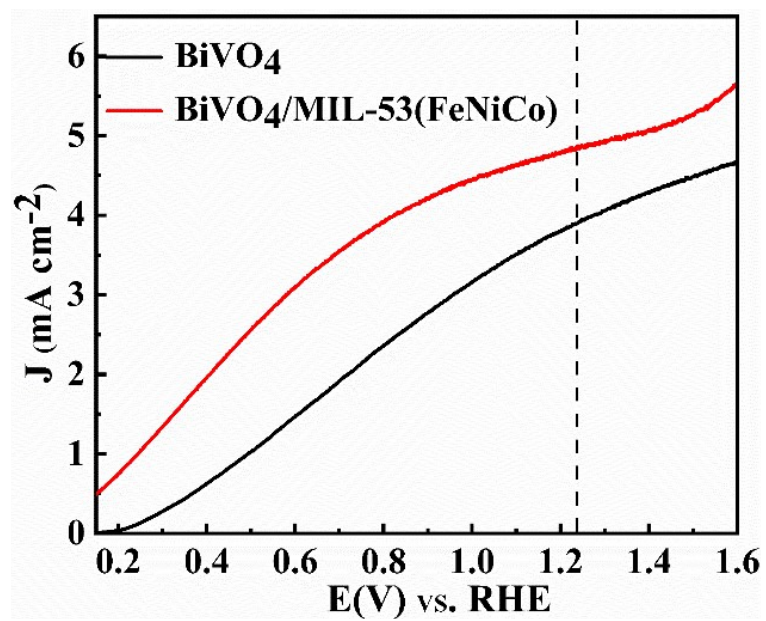

Fig. S4. LSV curves measured with 1M  $\text{Na}_2\text{SO}_3$ .

| <b>Samples</b>                    | <b><math>R_s</math></b> | <b><math>R_{ct,bulk}</math></b> | <b><math>R_{ct,trap}</math></b> |
|-----------------------------------|-------------------------|---------------------------------|---------------------------------|
| BiVO <sub>4</sub>                 | 83.64                   | 179                             | 185.5                           |
| BiVO <sub>4</sub> /MIL-53(FeNiCo) | 86.79                   | 73.52                           | 127.1                           |

**Tab. S1** Equivalent circuit EIS data of BiVO<sub>4</sub> and BiVO<sub>4</sub>/MIL-53(FeNiCo) photoanodes.
